# Supplementary material for: The role of atmospheric CO 2 in controlling patterns of sea surface temperature change during the Pliocene
Source: Copernicus journal article supplement (doi:10.5194/cp-2023-98), 2023-11-30
Supplement: Supplementary file 1 [file cp-2023-98-supplement.zip]

# Supplement of ‘The role of atmospheric CO<sub>2</sub> in controlling patterns of sea surface temperature change during the Pliocene’

## S1. Impact of calibration choice

The impact of calibration choice does not affect the FCO<sub>2</sub> on SST results (Fig. S1). Using the Müller et al. (1998) calibration of the  $U_{37}^{K'}$  data and the BAYMAG calibration (Tierney et al., 2019) of the Mg/Ca data (both in McClymont et al., 2020), many of the same sites are represented and the range in FCO<sub>2</sub> on SST at individual proxy sites is not changed.

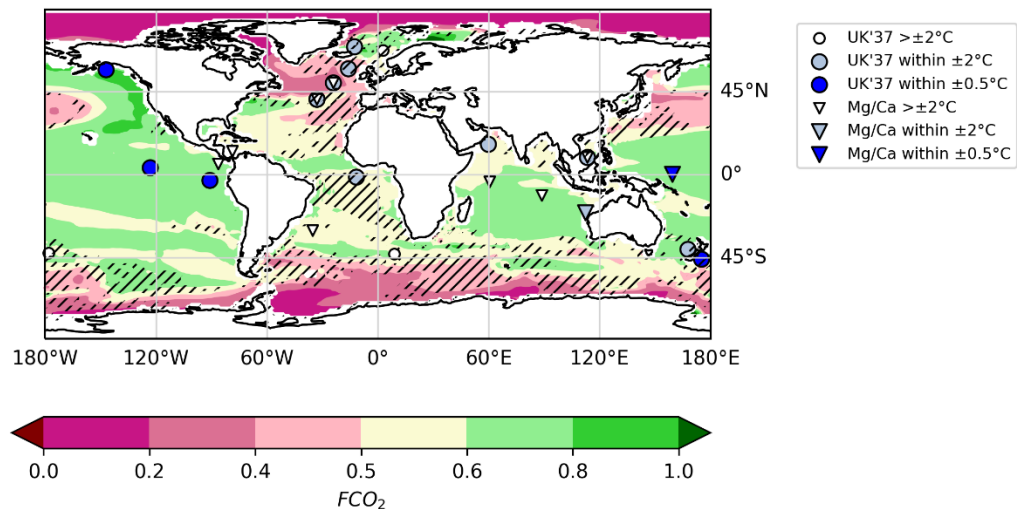

**Figure S1: FCO<sub>2</sub> on SST MMM with proxy site locations.** Proxy data is for KM5c presented in McClymont et al. (2020) and is either  $U_{37}^{K'}$  data using the Müller et al. (1998) calibration (circles) or Mg/Ca data using the BAYMAG calibration (triangles). Seven sites with  $U_{37}^{K'}$  data (Sicily Punta Piccola, U1387, ODP625, ODP1081, ODP1981, ODP1084 and ODP1087) and two sites with Mg/Ca data (DSDP603 and ODP959) are not shown as no FCO<sub>2</sub> on SST data is available due to the sites falling on land in the model Pliocene land-sea mask.

Four Mg/Ca sites are represented using the BAYMAG calibration that are not represented in the PlioVAR Mg/Ca calibration used in the main text: sites DSDP609, ODP709, ODP763 and ODP516. Only one additional  $U_{37}^{K'}$  site is represented when using the Müller et al. (1998) calibration compared to the BAYSPLINE calibration (Tierney and Tingley, 2018) in the main text: site U1137.

CO<sub>2</sub> forcing remains dominant for almost all of the sites (21 of 23), with a maximum FCO<sub>2</sub> on SST value of 0.82 at site U1417. The only sites predominantly driven by non-CO<sub>2</sub> forcing are consistent with the calibration choices for the main paper: site DSDP609 (0.27) and site ODP982 (0.44).

Commenting on the level of data-model agreement by calibration choice is beyond the scope of this paper, but there are approximately equal proportions of sites within ±0.5°C and ±2°C as in the main paper (Table S1).

| Data-model agreement        | Number of sites, by calibration |                      |         |         |
|-----------------------------|---------------------------------|----------------------|---------|---------|
|                             | $U_{37}^{K'}$                   |                      | Mg/Ca   |         |
|                             | BAYSPLINE                       | Müller et al. (1998) | PlioVAR | BAYMAG  |
| $< \pm 0.5^{\circ}\text{C}$ | 4 of 15                         | 4 of 16              | 0 of 6  | 1 of 10 |
| $< \pm 2^{\circ}\text{C}$   | 7 of 15                         | 9 of 16              | 1 of 6  | 1 of 10 |
| $> \pm 2^{\circ}\text{C}$   | 4 of 15                         | 3 of 16              | 5 of 6  | 8 of 10 |

**Table S1: Number of sites with levels of data-model agreement by calibration. Data-model agreement within  $\pm 2^{\circ}\text{C}$  does not include the sites within  $\pm 0.5^{\circ}\text{C}$ . The BAYSPLINE, Müller et al. (1998) and BAYMAG data for KM5c are presented in McClymont et al. (2020); the PlioVAR Mg/Ca data are in McClymont, Ho et al. (2023).**

25

**S2. FCO<sub>2</sub> on SST by model at the six proxy sites with uncertainty in FCO<sub>2</sub>**

| Site            | FCO <sub>2</sub> on SST by model |       |        |        |         |           |
|-----------------|----------------------------------|-------|--------|--------|---------|-----------|
|                 | CCSM4-UoT                        | CESM2 | COSMOS | HadCM3 | MIROC4m | NorESM1-F |
| ODP662          | 0.47                             | 0.44  | 0.90   | 0.32   | 0.71    | 0.70      |
| DSDP607 / U1313 | 0.81                             | 0.25  | 1.49   | 3.23   | 0.02    | 0.43      |
| ODP982          | 0.59                             | 0.28  | 0.75   | 0.25   | 0.66    | 0.34      |
| ODP1143         | 0.48                             | 0.45  | 0.91   | 0.57   | 1.54    | 0.46      |
| DSDP594         | 0.49                             | 0.37  | -0.75  | 0.81   | 0.84    | 1.24      |

**Table S2: FCO<sub>2</sub> on SST by model at sites with uncertainty in the dominant forcing (i.e., three or fewer of the models agree whether FCO<sub>2</sub> < 0.5 or FCO<sub>2</sub> > 0.5).**

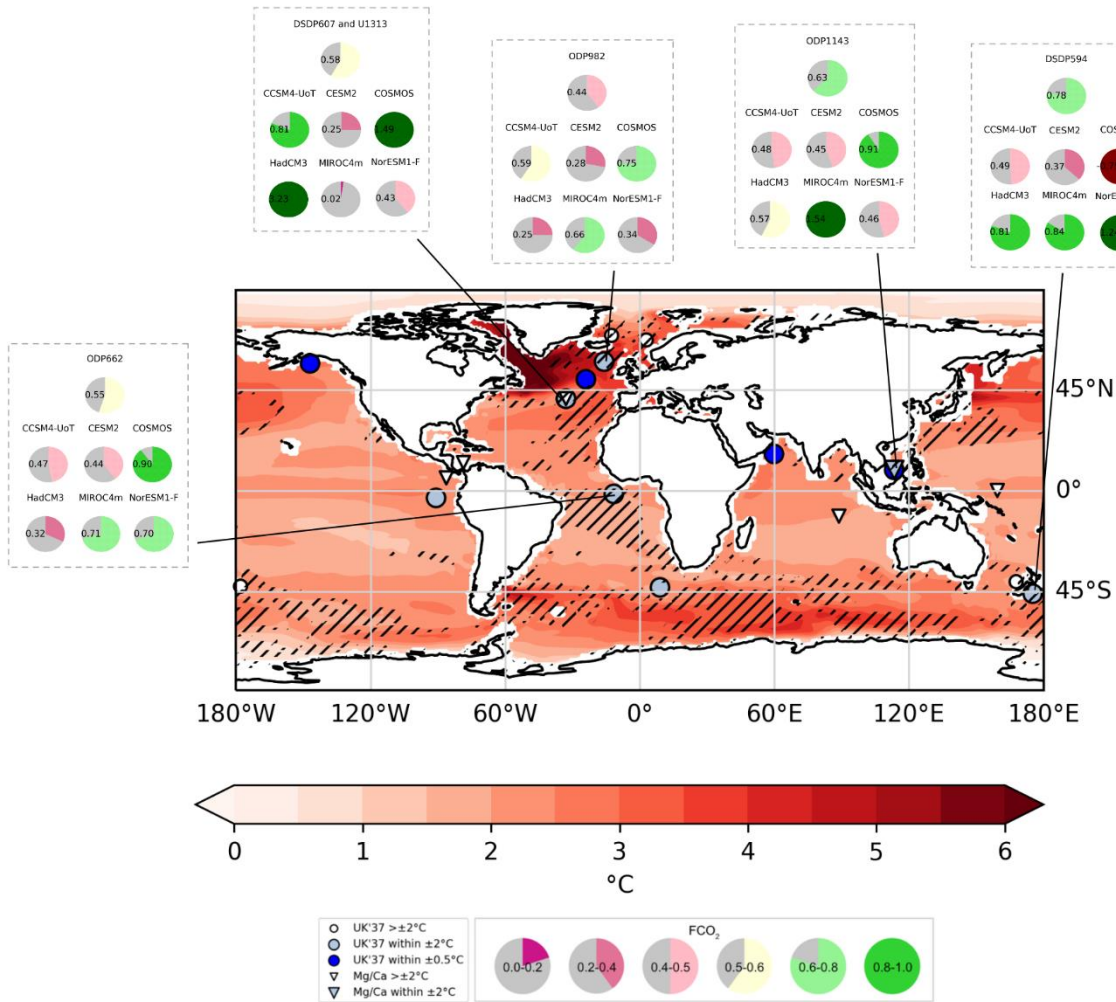

Figure S2: MMM Eoi<sup>400</sup>-E<sup>280</sup> SST anomaly, represented by the background red shading. The MMM is comprised from CCSM4-UoT, CESM2, COSMOS, HadCM3, MIROC4m and NorESM1-F. Hatching represents uncertainty in FCO<sub>2</sub>, where three or fewer of the six models agree on the dominant forcing (i.e., whether FCO<sub>2</sub> < 0.5 or FCO<sub>2</sub> > 0.5). The shape of the overlying symbols denotes the type of proxy data at each site (circle =  $U_{37}^{K'}$ , triangle = Mg/Ca); and the colour represents the level of data-model agreement (darker = stronger agreement). All proxy data is for KM5c.

The FCO<sub>2</sub> on SST is represented by pie charts at each proxy site where there is good data-model agreement (i.e., the MMM Eoi<sup>400</sup>-E<sup>280</sup> SST anomaly is within  $\pm 2^\circ\text{C}$  of the proxy data SST anomaly) and uncertainty in FCO<sub>2</sub> (i.e., three or fewer of the models agree whether FCO<sub>2</sub> < 0.5 or FCO<sub>2</sub> > 0.5). The pie chart at the top of each box is the MMM, with the FCO<sub>2</sub> on SST in each of the six models shown individually below. The proportion of the pie chart that is coloured denotes the proportion of total change attributable to CO<sub>2</sub> forcing (the FCO<sub>2</sub>), also represented by the colour.

S3. Sampling densities at proxy sites with site names

|              | $U_{37}^{K'}$ sites                                                |                                                                                   | Mg/Ca sites                             |                        | 45 |
|--------------|--------------------------------------------------------------------|-----------------------------------------------------------------------------------|-----------------------------------------|------------------------|----|
| n            | KM5c                                                               | PRISM3                                                                            | KM5c                                    | PRISM3                 |    |
| n ≤ 5        | ODP907, DSDP593, DSDP607, ODP1143, U1417, ODP1090, ODP982, DSDP594 | DSDP610*                                                                          | DSDP214, ODP806, ODP1241, ODP999, U1313 | DSDP214                |    |
| 5 < n ≤ 25   | ODP846, DSDP609, ODP722, ODP642, ODP1125, U1313, ODP662            | DSDP593, U1417, ODP999                                                            | ODP1143                                 | ODP806                 | 50 |
| 25 < n ≤ 50  | -                                                                  | ODP907, ODP1090                                                                   | -                                       | ODP1241, ODP999, U1313 |    |
| 50 < n ≤ 100 | -                                                                  | ODP642, ODP662, DSDP607, U1307*, ODP982, DSDP609, U1313, ODP1143, ODP846, DSDP594 | -                                       | ODP1143                | 55 |
| n > 100      | -                                                                  | ODP1125, ODP722                                                                   | -                                       | -                      |    |

Table S3: Sampling densities at proxy sites. Note that two sites (U1313 and ODP1143) have  $U_{37}^{K'}$  and Mg/Ca data available for both KM5c and the PRISM3 interval, and a further site (ODP999) has only Mg/Ca data available for KM5c but both Mg/Ca and  $U_{37}^{K'}$  data available for the PRISM3 interval. Sites marked with an asterisk (\*) only have PRISM3 interval data available (no data is available for KM5c).

References

McClymont, E. L., Ford, H. L., Ho, S. L., Tindall, J. C., Haywood, A. M., Alonso-Garcia, M., Bailey, I., Berke, M. A., Littler, K., Patterson, M. O., Petrick, B., Peterse, F., Ravelo, A. C., Risebrobakken, B., De Schepper, S., Swann, G. E. A., Thirumalai, K., Tierney, J. E., van der Weijst, C., White, S., Abe-Ouchi, A., Baatsen, M. L. J., Brady, E. C., Chan, W.-L., Chandan, D., Feng, R., Guo, C., von der Heydt, A. S., Hunter, S., Li, X., Lohmann, G., Nisancioglu, K. H., Otto-Bliesner, B. L., Peltier, W. R., Stepanek, C. and Zhang, Z.: Lessons from a high-CO<sub>2</sub> world: an ocean view from ~ 3 million years ago, Clim. Past, 16(4), 1599-1615, <https://doi.org/10.5194/cp-16-1599-2020>, 2020.

Müller, P. J., Kirst, G., Ruhland, G., Storch, I. V. and Rosell-Melé, A.: Calibration of the alkenone paleotemperature index  $U_{37}^{K'}$  based on core-tops from the eastern South Atlantic and the global ocean (60°N-60°S), Geochim. Cosmochim. Ac., 62(10), 1757-1772, [https://doi.org/10.1016/S0016-7037\(98\)00097-0](https://doi.org/10.1016/S0016-7037(98)00097-0), 1998.

Tierney, J. E. and Tingley, M. P.: BAYSPLINE: A new calibration for the alkenone paleothermometer, Paleoceanography and Paleoclimatology, 33(3), 281-301, <https://doi.org/10.1002/2017PA003201>, 2018.

Tierney, J. E., Malevich, S. B., Gray, W., Vetter, L., and Thirumalai, K.: Bayesian calibration of the Mg/Ca paleothermometer in planktic foraminifera, *Paleoceanography and Paleoclimatology*, 34(12), 2005-2030, <https://doi.org/10.1029/2019PA003744>, 2019.
